# Gradual Compaction of the Nascent Peptide During Cotranslational Folding on the Ribosome

Marija Liutkute<sup>1</sup>, Manisankar Maiti<sup>1</sup>, Ekaterina Samatova<sup>1</sup>, Jörg Enderlein<sup>2</sup> and Marina V. Rodnina<sup>1</sup>

<sup>1</sup> Department of Physical Biochemistry, Max Planck Institute for Biophysical Chemistry, Göttingen, 37077, Germany

<sup>2</sup> III. Institute of Physics - Biophysics, Georg August University, 37077 Göttingen, Germany.

\* To whom correspondence should be addressed. Tel: +49 551 201 2900; Fax: +49 551 201 2905; Email: [rodnina@mpibpc.mpg.de](mailto:rodnina@mpibpc.mpg.de)

## ABSTRACT

Nascent polypeptides begin to fold in the constrained space of the ribosomal peptide exit tunnel. Here we use force profile analysis (FPA) and photo-induced energy-transfer fluorescence correlation spectroscopy (PET-FCS) to show how a small  $\alpha$ -helical domain, the N-terminal domain of HemK, folds cotranslationally. Compaction starts vectorially as soon as the first  $\alpha$ -helical segments are synthesized. As nascent chain grows, emerging helical segments dock onto each other and continue to rearrange at the vicinity of the ribosome. Inside or in the proximity of the ribosome, the nascent peptide undergoes structural fluctuations on the  $\mu$ s time scale. The fluctuations slow down as the domain moves away from the ribosome. Folding mutations have little effect on folding within the exit tunnel, but abolish the final domain stabilization. The results show the power of FPA and PET-FCS in solving the trajectory of cotranslational protein folding and in characterizing the dynamic properties of folding intermediates.

The ribosome synthesizes proteins according to the sequence of the messenger RNA (mRNA) by progressively adding amino acids to the C-terminus of the nascent peptide. Many proteins begin to fold during ongoing translation<sup>1-3</sup>. Translation dictates how much of the nascent chain is available for folding at a given moment. The growing peptide moves from the peptidyl transferase center (PTC) of the ribosome into the peptide exit tunnel, which is ~100 Å long and ~20 Å wide at the vestibule where the nascent peptide emerges into the cytoplasm. The narrowest part of the tunnel – the constriction site – is ~30 Å away from the PTC and about 10 Å wide<sup>4</sup>. The dimensions of the exit tunnel generally prevent formation of complex tertiary interactions. However, studies using Förster Resonance Energy Transfer (FRET)<sup>5-8</sup>, cysteine accessibility assays<sup>9-11</sup>, and cryo-electron microscopy (cryo-EM)<sup>12-16</sup> of ribosome–nascent-chain complexes (RNCs) have shown that some secondary and tertiary structures can form inside specific folding zones of the exit tunnel. The upper part of the tunnel from the PTC to the constriction can accommodate  $\alpha$ -helices, whereas the lower part of the tunnel, past the constriction, allows secondary and tertiary hairpin structures to form. The ribosome can affect folding in different ways. It can alter the folding pathway of a protein from concerted to sequential, driven by the vectorial appearance of structural elements in the exit tunnel<sup>6,7</sup>; induce helical and random-coil behavior of nascent peptide, alter the folding rates, and facilitate the correct folding of nascent chains<sup>17-19</sup>. Upon emerging from the tunnel, the nascent chain can form a near-native compact structure while still bound to the ribosome<sup>8,16,20-24</sup>. The ribosome can significantly destabilize folded globular proteins in its vicinity<sup>17-19</sup>; the stability can be restored by extending the linker and allowing the protein to move further away from the ribosome surface<sup>21,25</sup>.

As the peptide folds within the exit tunnel, it exerts mechanical tension<sup>14,26</sup>, which is transmitted over the length of the nascent chain to the PTC<sup>27</sup>. In the absence of any additional mechanical force, a 17 amino acids (aa)-long translational arrest peptide, SecM, is sufficient to stall translation<sup>28</sup>. A high-tension mechanical pulling force (7 pN on average) originating from nascent protein folding<sup>29</sup>, can alleviate the SecM stalling and restart translation<sup>14,26,29</sup>. This phenomenon is utilized in arrest peptide-mediated force profile assays (FPA) to monitor force generation events at various stages of cotranslational folding<sup>14,24,26,29-31</sup>. FPA can identify folding events at single-codon resolution, but this potential has not been utilized so far in identifying early folding intermediates inside the peptide exit tunnel.

Among the different approaches to study protein folding, fluorescence correlation spectroscopy (FCS) can provide unique insights into protein dynamics down to nanosecond time resolution<sup>32</sup>. To fully harness the FCS potential and study the local conformational fluctuations of peptide chains, FCS can be combined with fluorescence quenching by photoinduced electron transfer (PET-FCS)<sup>32</sup>. This approach was successfully applied to study protein folding and dynamics in solution<sup>33-35</sup>. PET requires short-range interactions (van der Waals contacts, <1 nm) between

quencher and dye, which allows to specifically monitor local structural fluctuations of protein chains. Using PET-FCS to monitor cotranslational folding intermediates on the ribosome could provide insight into their structural dynamics and detect rapid local fluctuations between different conformations of the nascent chain, but so far such experiments have not been carried out.

In this work, we apply FPA and PET-FCS to investigate the folding trajectory and conformational fluctuations of the  $\alpha$ -helical N-terminal domain (NTD) of an *E. coli* (N5)-glutamine methyltransferase protein HemK on the ribosome. We have chosen the NTD as a model protein because in solution it folds independently of the C-terminal domain and its folding on the ribosome differs dramatically from the two-state concerted folding of the free protein in solution<sup>6,7,31</sup>. The cotranslational folding pathway is not known in detail, but FRET and PET studies suggest that cotranslational folding of HemK NTD proceeds sequentially through several compact intermediates<sup>6,7</sup>, consistent with initial FPA results<sup>31</sup>. Furthermore, previous time-resolved experiments showed that the observed folding dynamics is rapid compared to the pace of translation, and that the nascent chains arrested at different stages of translation (stalled RNCs) faithfully reflect the dynamics that occurs during synthesis<sup>6</sup>. Here, we identify the timing of folding events for the wild-type (wt) NTD and its destabilized 4xA variant, uncover the rates of conformational fluctuations of cotranslational folding intermediates, and define the contribution of the ribosome in maintaining the stability of these compact structures.

## RESULTS

### Sequential folding of HemK NTD on the ribosome.

Native folded HemK NTD (72 amino acids (aa)) consists of five  $\alpha$ -helices (H1 to H5) arranged into a globular domain, identical to the NTD conformation in the full HemK protein<sup>36</sup> (Fig. 1a). To map the cotranslational folding pathway, we performed high-resolution FPA covering aa 22 to 101 of HemK. We generated a construct that encodes aa 1 to 101 of HemK, which includes the NTD (aa 1-73) and part of the interdomain linker connecting the NTD to the C-terminal domain, followed by 17 codons for the SecM arrest peptide, and an additional sequence encoding 20 aa of protein CspA; the latter served as a reporter for high-tension events in the nascent chain. With the HemK101 construct, the resulting nascent chain (including the SecM peptide; 118 aa in total) is long enough for the entire NTD to emerge from the ribosome. At low force, the ribosome is stalled by the SecM arrest peptide, generating an arrested translation product (AR)<sup>14</sup>. If folding of HemK exerts force, translation arrest is alleviated, resulting in a longer peptide, which we denote as full-length (FL) (Fig. 1b). We then constructed

4

a series of mRNAs where the HemK sequence is trimmed in steps of one or two codons from the 3' end of the HemK mRNA. We translated these mRNAs in a fully reconstituted *in vitro* translation system from *E. coli*. In this system, the ribosomes are synchronized at the translation initiation step and start translation simultaneously after mixing with elongation factors and aa-tRNAs. The experimental setup allows for a single round of translation on a given mRNA, thereby avoiding the potential desynchronization due to re-initiation. The translation products, AR and FL, are separated by SDS-PAGE. By analyzing the fraction of FL product formed, we identify high-tension folding events (Fig. 1c).

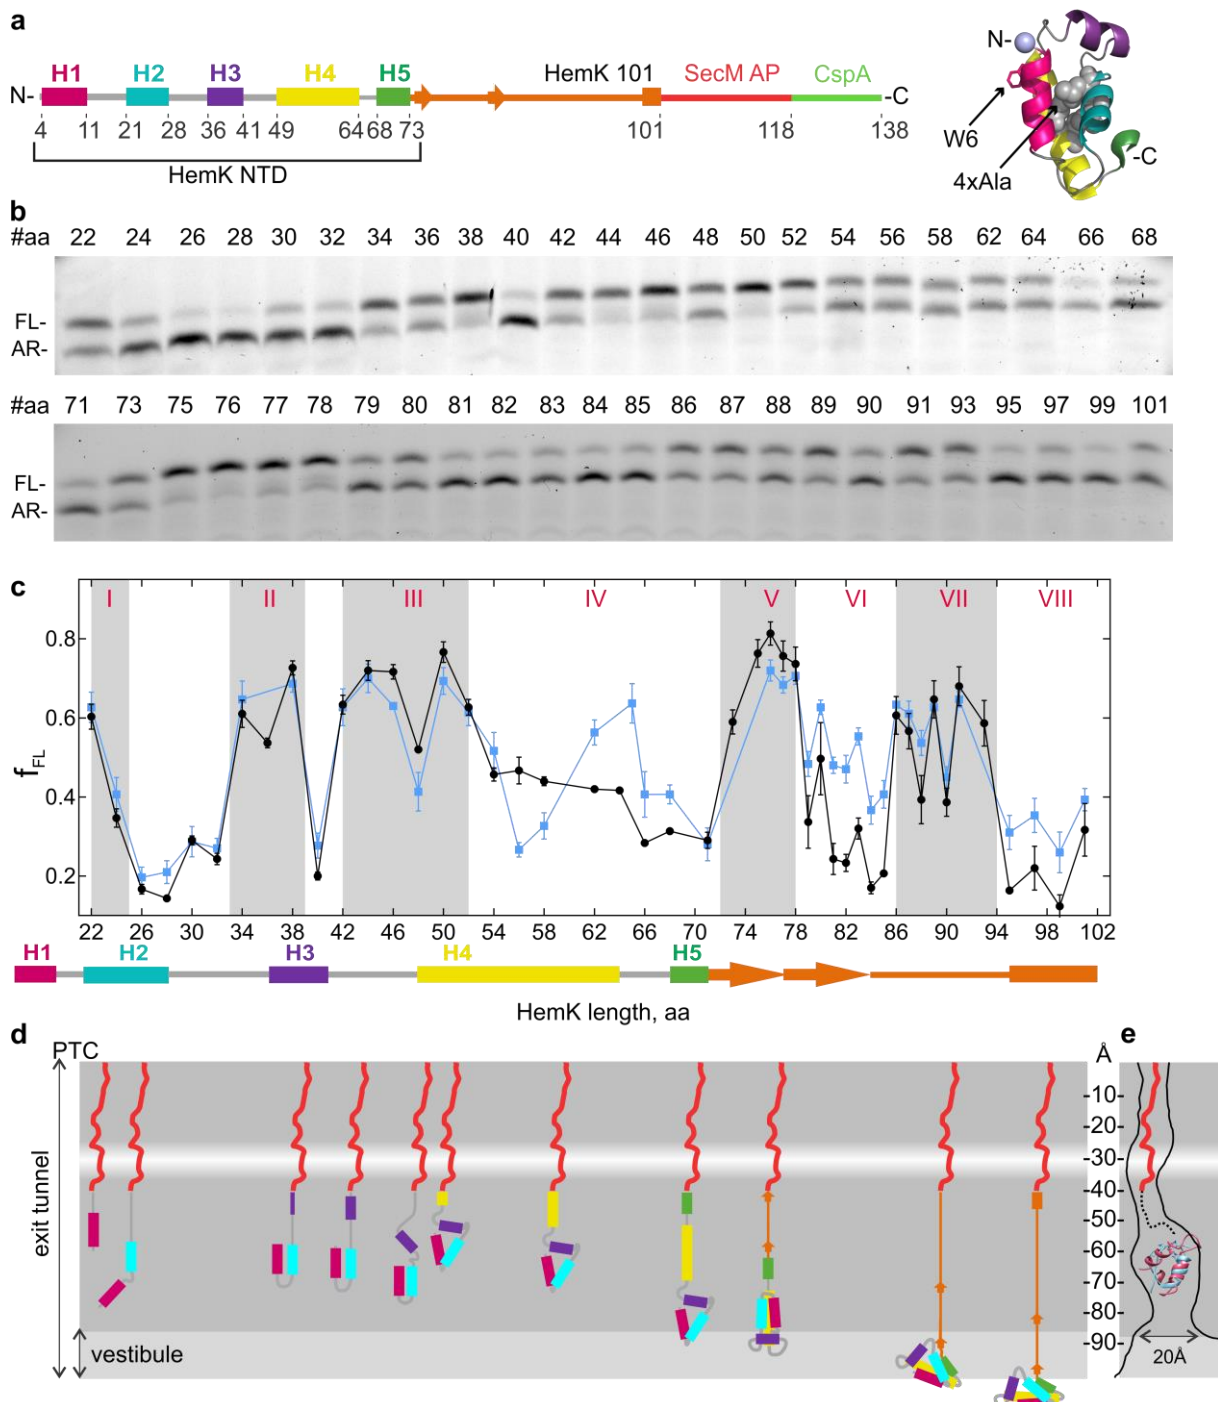

**Fig. 1 Co-translational folding of HemK NTD revealed by high-resolution FPA.**

- a. Schematic representation of the FPA sensor. HemK NTD helices (H) 1-5, the C-terminal linker (orange), SecM arrest peptide (red), and CspA (green) (left) and crystal structure of HemK NTD (PDB ID: 1T43) (right). The mutations introduced in the 4xA variant (L27A, L28A, L55A, L58A) are shown in gray and the N-terminal fluorophore position is shown in lilac.
- b. SDS-PAGE of *in vitro* translation products for the FPA construct of wt HemK. The length of the nascent chain from the N-terminus to SecM AP is indicated (#aa). FL, full-length product; AR, arrested peptide. For controls with shorter nascent chains, see Supplementary Fig. 1d.
- c. Force profile of HemK NTD folding.  $f_{FL}$  is the fraction of the full-length product formed during *in vitro* translation. Black, HemK wt; blue, HemK 4xA mutant; error bars indicate standard error of mean calculated from three independent biological replicates ( $N=3$ ). The schematic underneath shows the potential secondary structure of HemK at the indicated aa chain length.
- d. Schematic diagram of HemK NTD compaction events during translation; color code as in (a). The constriction site is indicated by a white band.
- e. Schematic overlay of the HemK H1-H3 crystal structure (pink) (PDB ID: 1T43) and ADR1 Zn finger domain crystal structure (green) inside the peptide exit tunnel, 60-80 Å from the PTC<sup>14</sup> (PDB ID: 2ADR; EM map: EMD-3079).

The detailed force profile of the HemK NTD reveals several distinct force-generating folding events starting early inside the exit tunnel until the entire NTD emerges from the ribosome (Fig. 1c,d). The early high-tension regions are observed at nascent chain lengths of aa 22-24 (I), 33-39 (II) and 42-52 (III) with a transient force relief at aa 48. At these chain lengths, the nascent peptide is likely to reside in the exit tunnel, as it is protected from protease digestion<sup>6</sup>. At 22-24 aa, the nascent peptide entails H1 and the subsequent loop region that moved past the tunnel constriction; hence, folding of H1 on its own or together with the first helical turn of H2 produce enough force to alleviate SecM stalling. If the polypeptide is truncated within the loop between H1 and H2, tension is abolished (Supplementary Fig 1d), suggesting that the entire first loop sequence together with H1 are necessary to create the high tension event. This very early cotranslational intermediate of HemK folding deep inside the exit tunnel was not observed so far. The force level decreases as more of H2 emerges and H1 moves further down the exit tunnel, and then increases again before the complete helix H3 is synthesized. It is likely that once H1 and H2 move towards the more open space of the vestibule, they begin to form tertiary interactions, thereby generating tension.

Region III at aa 42–52 (Fig. 1c,d) broadly coincides with the compacted intermediate identified by FRET and FPA studies<sup>6,7,31</sup>. The tension increases as the entire H3 emerges below the constriction and most likely corresponds to the formation of H3 and its docking onto the preceding two-helix structure. The transient tension relief at 48 amino acids may separate the helix formation and docking events. The H1-H3 intermediate structure is expected to reside

approximately 50-60 Å away from the PTC in the region within the exit tunnel that is known to accommodate a folded small zinc-finger domain protein (ADR1)<sup>14</sup>. To validate the feasibility of the HemK intermediate forming in this region of the tunnel we have superimposed the HemK H1-H3 onto the structure of the ADR1 domain in the tunnel<sup>14</sup>. The two domains are of similar size (Fig. 1e), and even if the HemK H1-H3 occupies a slightly larger volume than ADR1, it is very likely that the folding intermediate of H1-H3 can be accommodated in this region of the tunnel. The analysis of the folding regions I-III provides the first example of multiple cotranslational folding intermediates being resolved in the exit tunnel.

As HemK becomes longer than 53 aa, the tension decreases to intermediate values, but still remains above the baseline tension level (~0.2) (Fig. 1c, region IV). Protease protection experiments suggest that when the nascent chain reaches the total length of 84 aa, position 34 (fluorescently labeled in those experiments) is no longer protected by the ribosome. In the FPA experiments, this total chain length corresponds to 67 aa of HemK, of which at least 34 aa must be exposed to the solvent. At the HemK NTD length of 72 aa (99 aa total), part or all of H4 may emerge from the vestibule and be ready to initiate the formation of further hydrophobic interactions in the HemK NTD (Fig. 1d). The next high-tension intermediate at aa 72-78 (region V) forms when H5 and part of the following interdomain linker move past the constriction and H4 is further displaced towards the vestibule. A stable folding of H4 within the exit tunnel may form hydrophobic interactions with the H1-H3 structure, which generates the high-tension peak because the structure is closer to a narrow part of the vestibule. As the nascent chain grows, the H1-H4 intermediate again moves away from the exit port, which results in further structural rearrangements reflected in the decrease of tension interrupted by short force spikes at aa 80 and 83 (region VI).

The final high-tension compaction (step VII) occurs when the length of the HemK NTD exceeds 86 aa, placing the entire NTD, H1 through H5, outside of the confines of the exit tunnel (Fig. 1c,d). When NTD length is >95 aa (112 aa total peptide length), we observe only basal tension levels, indicating that the final cotranslational folding to a near-native conformation of the NTD occurred at step VII, consistent with the final steps of NTD cotranslational folding suggested previously<sup>6,7</sup>.

In addition to the wt HemK NTD, we examined cotranslational folding of the destabilized HemK NTD variant (4xA), where four conserved Leu residues of the hydrophobic core (Leu 27 and 28 in H2, and 55 and 58 in H4) were mutated to Ala (Fig. 1a)<sup>6</sup>. The force profile inside the exit tunnel is identical for the wt and the 4xA variant (folding steps I-III), but as the peptide begins to emerge at the vestibule, the force profiles start to deviate (Fig. 1c, Supplementary Fig. 1a,e). As more of H4 becomes accessible for docking to the H1-H3 structure, Leu-specific interactions within the hydrophobic core start to matter. For the 4xA variant, we observe a drop

in tension at a total length of 73 aa (56 aa of HemK NTD), and the appearance of a high-force intermediate at a chain length where the tension in the wt HemK NTD gradually decreases (aa 62-64) (region IV). The change in folding at region IV could result from a delay (of 4 aa) in folding for the 4xA variant compared to the wt. This could be because in the absence of the key Leu residues in the hydrophobic core a longer peptide is required to stabilize the packing, whereas the wt variant folds continuously as more of the nascent chain becomes available. Alternatively, it is possible that this peak indicates an intermediate state unique to 4xA.

The two following cotranslational folding steps V and VII are similar in duration and amplitude for 4xA and wt, suggesting that these rearrangements are independent of the hydrophobic core packing. In contrast, in regions VI and VIII, the 4xA variant generates consistently higher tension than the wt NTD. This agrees with the notion that the 4xA variant adopts an expanded conformation; the timing of the discrete rearrangements that occur at step IV appears similar for 4xA and wt NTD, but each time when a more bulky 4xA peptide moves towards the ribosome surface, the tension increases. This difference in tension may indicate that the non-native 4xA fold occupies a larger volume has a more dynamic structure, or there are changes in domain stability<sup>37</sup>.

### **Nascent chain dynamics monitored with PET-FCS**

Next, we monitored the dynamics of ribosome-bound nascent chains by PET-FCS. We utilized the native Trp6 residue (W6) in HemK that could quench an N-terminal ATTO655 fluorophore upon coming into van der Waals distance<sup>38</sup>. The dynamic motions of the nascent chain define the frequency of these quenching interactions, and the resulting fluorescence intensity fluctuations can be used to track the internal dynamics of the nascent chain<sup>32</sup>.

First, we studied the dynamics of the HemK NTD in solution. We prepared a 70 aa-long NTD wt or 4xA by *in vitro* translation using an ATTO655-labeled initiator Met-tRNA<sup>fMet</sup>, purified the complexes, and then chemically released the nascent chains from the ribosome (Methods). As a control for the PET signal, we also prepared NTD variants where Trp6 is replaced with non-quenching Phe (W6F). The isolated W6F HemK NTD variant is 90% folded at 37°C compared to the wt and has the same translation rate and profile<sup>6</sup>; the matching cotranslational folding trajectory was further confirmed with the FPA assay (Supplementary Fig 1b,c). FCS measurements of the isolated NTD showed a stable and highly reproducible diffusion time of the peptide ( $\tau_{d1} \approx 6 \times 10^{-5}$  s) (Supplementary Table 1). However, no PET signal was observed, as the autocorrelation functions (ACF) with W6 and W6F proteins are identical for wt and 4xA constructs (Fig. 2a). This result indicates that there are no dynamic fluctuations at the N-terminus of the HemK NTD in solution. To test this notion, we performed control measurements

with a short HemK peptide of 14 aa, which should be unstructured in solution (Fig. 2b). After testing different conditions, we were able to observe fast dynamics due to PET with a quenching relaxation time of  $\sim 5 \times 10^{-7}$  s in the presence of glycerol (Fig. 2b, Supplementary Table 1). However, when the experiments with HemK NTD wt or 4xA are repeated at the same conditions, we observe only an increase in the diffusion time ( $\tau_{d1} = \sim 30 \times 10^{-5}$  s), but no PET signal corresponding to structural fluctuations (Fig. 2c, Supplementary Table 1). Thus, in solution, HemK NTD, as well as its destabilized 4xA variant, folds into a domain where W6 is not accessible for interaction with the N-terminal dye.

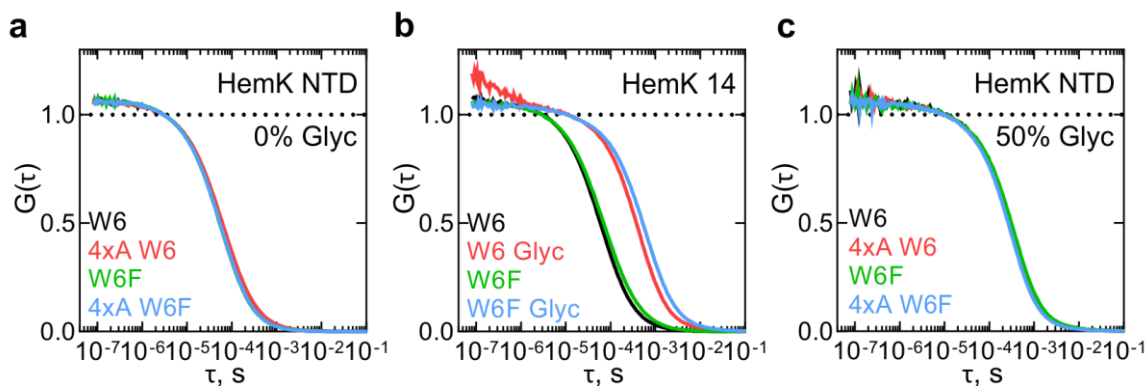

**Fig 2 Monitoring dynamics of HemK constructs in solution by PET-FCS.**

- ACF of the HemK NTD free in solution. Black, wt variant with Trp at position 6 (W6); red, destabilized 4xA HemK W6 variant; green, HemK wt with no Trp in the nascent chain (W6F); blue, 4xA HemK W6F variant; each curve is derived from two separate release experiments and each experiment consists of at least 4 technical replicates ( $N \geq 8$ ).
- Autocorrelation curves of HemK14 peptide in solution. Black, W6 variant at low solvent viscosity; red, W6 at high viscosity in the presence of 50% glycerol (Glyc); green, W6F variant at low viscosity; blue, W6F variant at high viscosity. Shown are representative curves of at least two experimental repeats, each consisting of at least 4 technical replicates ( $N \geq 8$ ).
- Autocorrelation curves of HemK NTD released from the ribosome at high viscosity conditions (50% glycerol). Black, wt W6; red, 4xA W6; green, wt W6F; blue, 4xA W6F. Each curve is derived from two separate release experiments and each experiment consists of at least 4 technical replicates ( $N \geq 8$ ).

We next applied PET-FCS to study dynamics of nascent peptides. We chose the peptide lengths at which all of the NTD has been synthesized and generated RNCs at three stages of translation based on the FRET and PET measurements<sup>7</sup> (Fig. 3a). While we indicate the approximate FPA profile peak that these RNC constructs will correspond to, the all-native chain dynamics might differ from the nascent peptides in the FPA assay due to the presence of non-native SecM arrest sequence at the C-terminus (17aa) (Fig. 1a). To monitor the nascent chain dynamics during the compaction of H1-H3 within the exit tunnel, we used RNC with a 70 aa-long nascent chain (HemK 70), which shows a high FRET signal and maps roughly between



FPA regions III and IV (Fig. 1c,d). An RNC with the 102 aa-long nascent chain (HemK 102) should expose H1-H4 at the ribosome surface and maps onto the end of FPA region VI; earlier PET measurements indicate a folding transition around this chain length<sup>7</sup>. To monitor the fully emerged domain, we used an RNC with a 112 aa-long nascent chain (FPA region VIII; Fig. 1c,d). To understand how destabilization of the hydrophobic core of the NTD affects the nascent-chain dynamics, we also used the respective 4xA variants. One complication of the PET-FCS experiments with ribosome complexes is that the Trp residues in ribosomal proteins and guanines of the rRNA also quench the N-terminal fluorophore<sup>38</sup>. To account for these interactions of the nascent peptide with the ribosome surface, we compare the W6 and the respective W6F control constructs.

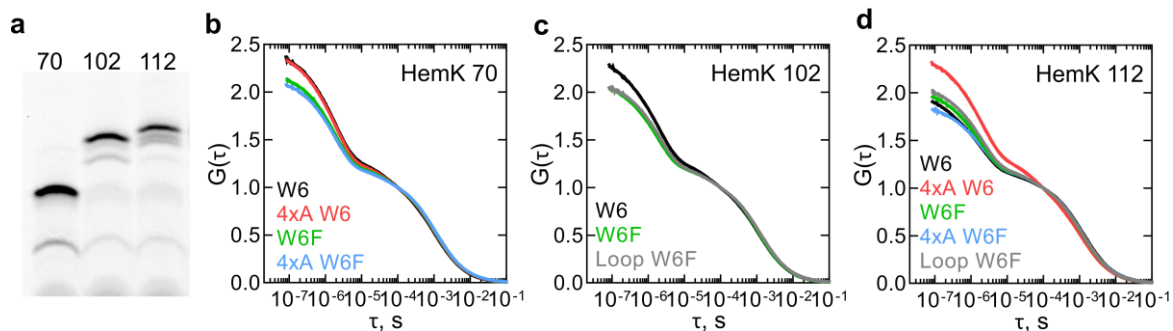

**Fig 3 Dynamics of HemK on the ribosome monitored by PET-FCS.**

- SDS PAGE of nascent chains produced by *in vitro* translation visualized after RNC purification using the fluorescence of ATTO655. The aa length of HemK wt constructs is indicated.
- Autocorrelation curves for HemK 70-RNC. Black, wt W6; red, 4xA W6; green, wt W6F; blue, 4xA W6F. Each curve is derived from at least two separate RNC preparations and each experiment consists of at least 4 technical replicates ( $N \geq 8$ ).
- Autocorrelation curves for HemK 102-RNC. Black, wt W6, green, wt W6F; grey, W6F variant with loop extension between helix 3 and helix 4. Each curve is derived from at least two separate RNC preparations and each experiment consists of at least 4 technical replicates ( $N \geq 8$ ).
- Autocorrelation curves for HemK 112-RNC. Black, wt W6; red, 4xA W6; green, wt W6F; blue, 4xA W6F; grey, W6F variant with a loop extension between helix 3 and helix 4. Each curve is derived from a minimum of two separate RNC preparations and each experiment consists of at least 4 technical replicates ( $N \geq 8$ ).

For all RNCs tested, PET-FCS experiments yield multiphasic ACFs spanning the timescale from ms to ns. The diffusion time of the RNC is in the ms time range<sup>25</sup>. Initial exponential fitting reveals at least three fast dynamic components in the  $\mu$ s time range. One of the components most likely reflects the triplet state pumping and relaxation of the ATTO655 dye in the complex with the ribosome (Supplementary Fig. 2). The relaxation time of the triplet state of ATTO655

attached to the peptide on the ribosome, about 40  $\mu\text{s}$ , is somewhat larger than that measured with a model peptide, which is in the range of 2  $\mu\text{s}$  (ref.<sup>39</sup>). We then fitted the ACF curves (Fig. 3b-d) using a combination of two exponential decays, the triplet state correction, and the diffusion term (Methods). The two relaxation times ( $\tau = 1/k$ ) as estimated by fitting, one in the tens of  $\mu\text{s}$  and the other in the  $\mu\text{s}$  time range, were observed in all tested complexes, regardless of the presence of the W6 residue that causes intra-chain PET (Supplementary Table 2). However, the  $\tau_1$  and  $\tau_2$  values and the respective amplitudes are different for the respective W6 and W6F constructs, indicating that part of the effect is due to intra-chain PET. Taking into account the known timescales of peptide dynamics in solution<sup>34,39,40</sup>, the shorter relaxation time  $\tau_1$  most likely reflects the quenching interactions of the fluorophore with the internal Trp or the quenchers at the ribosome surface. The slower relaxation time  $\tau_2$  is usually attributed to the dynamics of conformational intermediates. To challenge this assignment, we designed two additional RNCs where we changed the dynamics of peptide chain rearrangements. Because long and unstructured loops are known to enhance conformational fluctuations through increased entropy of the folded state<sup>41</sup>, we extended a loop between H3 and H4 by five additional Gly residues and generated two RNCs with different lengths of this construct, called 102 loop and 112 loop, respectively. Both  $\tau_1$  and  $\tau_2$  values are affected by the loop mutations (Supplementary Table 2). Because  $\tau_1$  and  $\tau_2$  are apparent values that have no biological meaning as such, in the following we develop a kinetic modeling approach to determine the elemental rates of nascent chain dynamics.

### **Kinetic model for the dynamics of nascent chains.**

To fit the ACF data, we build and examine a series of kinetic models starting with a simple two-step model and going through a number of alternative models of increasing complexity that would describe the whole dataset with the minimum number of parameters. We find that the minimal model that can fit our ACF dataset must include five equilibria (model 5e-H and model 5e-O) and models with fewer equilibria are insufficient (Supplementary Fig. 3) (Methods). To account for the exponential term on the  $\mu\text{s}$  time scale, we assume that nascent chains can undergo a conformational change from state C to state D ( $C \leftrightarrow D$ ) (Fig. 4). In each of these states the N-terminal dye can interact with the internal Trp6. The resulting quenched states are denoted as Wx, leading to the equilibria  $C \leftrightarrow Wc$  and  $D \leftrightarrow Wd$ . Given that these are fast PET interactions we model the quenched states separately without any equilibrium between them to limit the number of free fitted parameters. By analogy, a quencher on the ribosome surface can quench the fluorescence of states C or D, yielding a non-fluorescent state Rx and the equilibria  $C \leftrightarrow Rc$  and  $D \leftrightarrow Rd$  (model 5e-H; Fig. 4a, right panel). An alternative five equilibria model is possible (model 5e-O) (Supplementary Fig. 4), where the quenched states are not

unique, i.e. the Wx and Rx states are denoted as the same state W or R (Supplementary Fig. 4 right panels), this model allows for the possibility of moving from state C to state D and vice versa via one of the shared quenched states W or R.

We perform a global fit of the entire HemK RNC dataset to these models in order to determine the elemental rates of the outlined interactions. For reliable fitting of the  $\mu\text{s}$ -range data, we extract the dynamic component from the raw ACF curves by subtracting from each experimental ACF the diffusional and triplet state components using parameters of the analytical fit (Methods, Equation 1; Supplementary Table 2). This results in time courses with two exponential decays (Fig. 4). Because there is no solution to calculate elemental rates from the two apparent rate constants, we additionally measured ACF of RNC 70 W6F and RNC 102 W6F at different free Trp concentrations (Supplementary Fig. 5). Global fit of the Trp titration data to the five-equilibria models (Methods) yielded ATTO655–Trp dequenching rate of about  $2 \mu\text{s}^{-1}$  (Supplementary Tables 3, 4). These values were then fixed during global fitting of the main dataset (Fig. 4 and Supplementary Fig. 4), which allowed us to obtain statistically significant values for rate constants describing nascent chain dynamics of each HemK NTD variant on the ribosome using both five-equilibria models (Fig. 4; Supplementary Fig. 4 and 6; Supplementary Tables 5, 6 and 7; Methods). Here we will primarily discuss the fitting results of the kinetic model 5e-H, which separates the fast PET-based interactions between dye and quencher, from the slower structural conformational fluctuations of the nascent chain itself, thus more adequately exposing the total extent of conformational fluctuations. It is worth noting that while the obtained absolute rate values are different between models 5e-H and 5e-O, the general trends revealed by the rate analysis are supported by both models (Fig 4 and Supplementary Fig.4; Tables 5 and 6).

Comparison of the rate constants for different complexes reveals, first, that the two structural states of the nascent chain, C and D, are very different with respect to their dynamics (Fig. 4; Supplementary Table 5). The rate constants of ATTO655 quenching by the ribosome is 20–50-fold slower in C compared to D in different RNCs. Likewise, quenching by intramolecular Trp6 is 80–200-fold slower in C than in D. We attribute this to lower dynamics of state C and thus denote it as compact, compared to state D, which we call dynamic. Thus, we identify two global conformational ensembles of ribosome-bound HemK NTD.

12

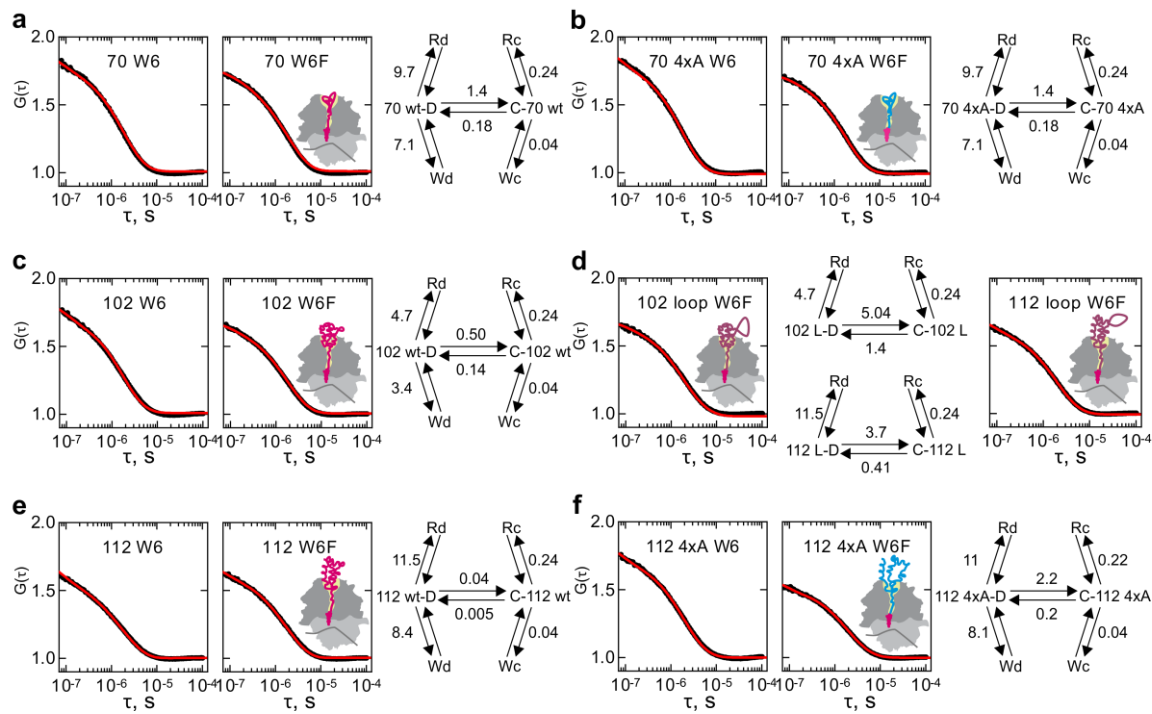

**Fig 4** Conformational dynamics of RNCs carrying various nascent chains. Shown are results of global fitting of autocorrelation data to the kinetic model 5e-H (right panel). Black – measured data; red – kinetic model simulation curve. C and D are two wt peptide conformations; Wx – Trp-quenched states; Rx – ribosome-quenched states. Cartoons indicate the presumed position of the nascent chains on the ribosome, with the wt nascent chains shown in magenta, without and with an extra loop, and the 4xA variant shown in blue.

- HemK 70 W6 and W6F.
- HemK 70 4xA W6 and W6F.
- HemK 102 W6 and W6F.
- HemK 102 and 112, both W6F, with loop extensions.
- HemK 112 W6 and W6F.
- HemK 112 4xA W6 and W6F.

The second observation is that for a given conformational state C or D, the rates of interaction with Trp or the ribosome are almost insensitive to the extent of folding or the position of the N-terminus on the ribosome, as the  $k_{on}$  value for Trp quenching is about  $0.04 \mu\text{s}^{-1}$  for state C and  $3\text{--}8 \mu\text{s}^{-1}$  for state D of all constructs. The low quenching rate constant in the compact states suggests that Trp is confined in the stable hydrophobic core of the respective intermediates. In contrast, the dynamic state presents a less compact structure wherein the more exposed native Trp interacts more frequently with the N-terminal dye. It is possible that the position of the N-terminus is defined at early stages of folding, which explains why it does not change with the peptide length over 70 aa. More surprisingly, the  $k_{on}$  for ribosome quenching is not strongly

dependent on the position of the nascent chain with respect to the ribosome, with  $k_{on} = 0.24 \mu\text{s}^{-1}$  for state C and ranging from  $5 \mu\text{s}^{-1}$  to  $11 \mu\text{s}^{-1}$  for state D. The dequenching rate of the ATTO655–ribosome complex is  $0.3 \mu\text{s}^{-1}$  and identical for 5e-H and 5e-O kinetic models (Supplementary Tables 5 and 6).

The largest difference related to the stage of nascent peptide folding and its position on the ribosome pertains to the equilibrium between states C and D. The compact state C is favored in all complexes, but the rate constants of the  $C \leftrightarrow D$  transitions differ dramatically, both decreasing with increasing protein length and its emergence outside the ribosome (Fig. 4 and Supplementary Table 5). The 4xA mutations in the hydrophobic core do not alter the equilibrium between the C and D states (HemK70 and HemK112), but when the domain emerges from the ribosome the mutations cause several orders of magnitude increase of the rate constants between these states (HemK112) (Fig. 4). Furthermore, introducing a loop of 6 aa dramatically increases the rates of transitions in both HemK102 and HemK112 (Fig. 4). Thus, as predicted<sup>41</sup>, the loop extensions increase the helix dynamics of the nascent chain, but do not alter the interaction with Trp or the ribosome surface.

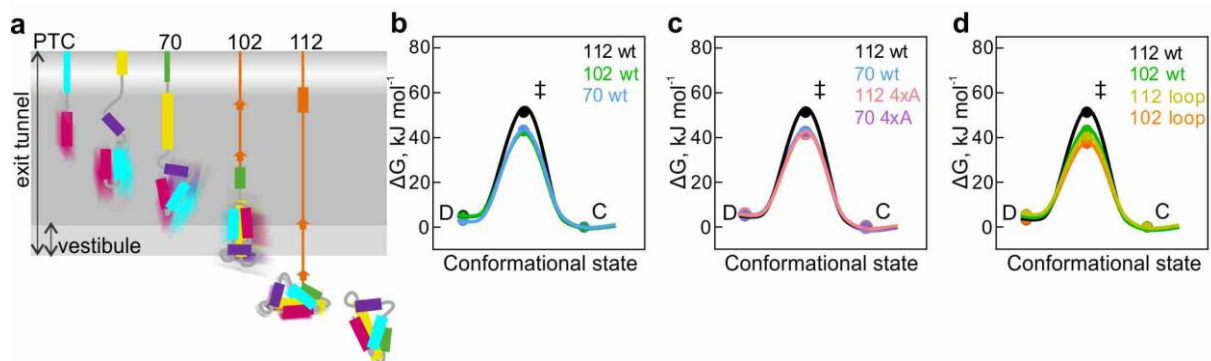

**Fig 5 Free energy barriers between different nascent chain conformations**

D – dynamic state; C – compact state; ‡ – transition state. Error bars are smaller than data points and represent propagated SEM from elemental rates derived from the kinetic fits to model 5e-H.

- Schematic diagram of cotranslational folding steps of HemK NTD with a visualization of nascent chain dynamics.
- HemK wt constructs of increasing length, 70 aa (blue), 102 (green), and 112 (black).
- HemK wt and 4xA variants, 70 wt (blue) 70 4xA (lilac), 112 (black), and 112 4xA (red).
- HemK wt and loop variants, 102 wt (green), 112 wt (black), 102 loop (orange), and 112 loop (yellow).

## DISCUSSION

In this work, we combined FPA and PET-FCS to reconstruct the trajectory of cotranslational folding and to evaluate the stability of the folding intermediates. The high-resolution FPA data show that nascent chains undergo sequential force-generating rearrangements that start inside the exit tunnel as soon as individual  $\alpha$ -helices pass the constriction site. The earliest detected force-generating folding intermediate entails as little as a single helix (H1) of the HemK NTD. Upon continued synthesis, emerging helices begin to interact with one another forming tertiary intermediates inside the peptide exit tunnel (Fig. 1d). Our results show that folding of HemK NTD is sequential<sup>7</sup> and that there are several tension-generating steps corresponding to folding intermediates inside and outside of the ribosome<sup>31</sup>. The formation of individual  $\alpha$ -helices and tertiary interactions between  $\alpha$ -helical elements within the exit tunnel are well documented<sup>9,12,14,24,42</sup>. FPA studies also demonstrate that the growing nascent chain continues to undergo structural adjustments after emerging from the exit tunnel; some, but not all, of these rearrangements are sensitive to the packing of the protein's hydrophobic core. In contrast, folding of the HemK NTD in solution is concerted, with only two discernible states, native and unfolded. Thus, sequential addition of amino acids during translation affects nascent-protein folding not only inside the exit tunnel, but also at the surface of the ribosome and results in a complex folding pathway with multiple folding intermediates.

Rapid sequential cotranslational folding observed here for HemK NTD can be rationalized using the concept of folding via cooperative folding units, foldons, which was suggested for several proteins based on a combination of NMR, mass spectrometry, and hydrogen-exchange pulse-labeling experiments<sup>43-45</sup>. The emerging view is that the foldons, comprised of one to two secondary structure elements, form rapidly (e.g. at a rate of  $2000\text{ s}^{-1}$  in RNaseH<sup>44</sup>), and once a foldon is formed, the protein undergoes a series of fast folding steps, with native-like foldons added rapidly at each step. The trajectory of how a particular protein folds is determined by the nature of foldon units, because each preceding unit guides and stabilizes the subsequent foldons in a thermodynamically downhill energy landscape<sup>46</sup>. The vectorial emergence of nascent peptide into the constrained space of the exit tunnel may allow nucleation of such folding units and restrict the number of potential interactions/conformations at a given chain length, thereby guiding folding through a relatively narrow energy landscape. This would also explain how folding of the HemK NTD on the ribosome is sequential, guided by the vectorial appearance of foldons during translation. In solution folding is concerted because formation of local folding units defines the rate of the concerted collapse into the native structure.

The PET-FCS experiments show that nascent peptides are dynamic and undergo internal conformational rearrangements on a  $\mu\text{s}$  time scale. We identify two subpopulations of folded nascent chains corresponding to the predominant compact and dynamic states, which differ in

their ability to interact with the local environment. The local dynamics of the N-terminus as monitored by intramolecular PET between the N-terminal ATTO655 and Trp6 is relatively slow for the compact state ( $0.04 \mu\text{s}^{-1}$ ). The dynamic state has quenching ( $3\text{--}8 \mu\text{s}^{-1}$ ) and dequenching (about  $2 \mu\text{s}^{-1}$ ) rates similar to those reported for the dynamic motion of proteins<sup>33,34,39,40,47</sup>. The quenching interaction with the ribosome is also slow for the compact ( $0.2 \mu\text{s}^{-1}$ ) and fast for the dynamic ( $5\text{--}11 \mu\text{s}^{-1}$ ) state; the dequenching rate is  $0.3 \mu\text{s}^{-1}$ . The latter rates differ from the dequenching of the ATTO655–Trp complex and most probably reflect the interactions of ATTO655 with guanine residues in rRNA. This is the first time these interactions have been characterized in a context of an RNA-containing macromolecule.

During folding in solution, the rates of fluctuations slow down several-fold as proteins advance from unfolded towards more compact conformations<sup>48,49</sup>. On the ribosome, the rates of fluctuations between the compact and dynamic states decrease as the nascent chain moves down the exit tunnel and emerges from the ribosome (Fig. 5a). Comparison of the free energy of the transition state ( $\Delta G^\ddagger$ ) barrier between the compact and dynamic states at different nascent chain lengths shows that as the nascent chain grows, transition state free energy increases from  $38 \text{ kJ mol}^{-1}$  for HemK70 to  $40 \text{ kJ mol}^{-1}$  for HemK102 and to  $46 \text{ kJ mol}^{-1}$  for HemK112 (Fig. 5b, Supplementary Table 8). The increase in  $\Delta G^\ddagger$  as the NTD moves away from the ribosome demonstrates how the proximity of the ribosome alters the dynamics of the nascent protein domain. Consistently with these results, isolated HemK NTD did not show any PET dynamics. Although the protein can unfold in solution (at a rate of  $1 \text{ s}^{-1}$  at  $37^\circ\text{C}$ ), such dynamics is probably too slow for the FCS and the unfolded state is too rare to be detected due to rapid folding ( $2000 \text{ s}^{-1}$ )<sup>6</sup>. These data provide further support to the notion that the stability of protein domains increases with the distance to the ribosome<sup>17-19,21,25</sup> and provide estimations for the rates of rapid conformational fluctuations of nascent proteins at different stages of folding. How the earliest steps of cotranslational folding (1<sup>st</sup> helix formation) could influence the ultimate nascent chain dynamics remains a question for future investigations.

The 4xA mutations destabilize the native hydrophobic packing of the domain and have a significant effect on native tertiary interactions. The FPA results show that nascent wt and 4xA NTDs form very similar compact intermediates inside the exit tunnel. PET-FCS analysis indicates that the dynamic fluctuations between compact and dynamic states have identical transition state barriers ( $\Delta G^\ddagger = 37.5 \text{ kJ mol}^{-1}$ ) for wt and 4xA HemK70 (Fig. 5c; Supplementary Table 8) and, in both cases, the respective intermediates are highly dynamic. In contrast, outside the tunnel, mutations in the hydrophobic core or loop extensions increase dynamic fluctuations of the nascent chains (Fig. 5c,d; Supplementary Table 8). In particular for the stably folded HemK112, the effect of the mutations is very large, decreasing the  $\Delta G^\ddagger$  value by  $\sim 10 \text{ kJ mol}^{-1}$  (Fig. 5c,d). The free-energy landscapes of protein folding in solution are generally shallow, i.e. the differences between the highs (barriers) and lows (energy minima) are in the

tens of  $\text{kJ mol}^{-1}$  rather than hundreds<sup>50</sup>. For example, the differences between partially unfolded high-energy states and the native states of proteins are between 17-54  $\text{kJ mol}^{-1}$  (ref. <sup>46</sup>). In the case of HemK NTD cotranslational folding a 10  $\text{kJ mol}^{-1}$  increase in the folding transition state barrier is sufficient to slow the nascent chain fluctuations by at least two orders of magnitude (Fig. 4e,f; Supplementary Table 5).

In summary, the present work shows how a small  $\alpha$ -helical protein domain folds co-translationally. It starts folding as soon as the first helical elements pass the constriction of the exit tunnel of the ribosome. With growing nascent chain, the emerging helical segments dock onto each other sequentially. The folding pathway entails numerous intermediates that continue to rearrange even when the domain emerges from the ribosome. Inside the nascent tunnel or in the proximity of the ribosome the nascent peptide is highly dynamic, undergoing structural fluctuations on the  $\mu\text{s}$  time scale. The fluctuations slow down as the domain moves away (or is released) from the ribosome. Destabilizing mutations have little effect on folding within the exit tunnel, but abolish the domain stabilization after its separation from the ribosome. The results show the power of FPA and PET-FCS in solving the trajectory of cotranslational protein folding and in characterizing the dynamic properties of folding intermediates.



## References

1. Kramer, G., Shiber, A. & Bukau, B. Mechanisms of Cotranslational Maturation of Newly Synthesized Proteins. *Annu Rev Biochem* **88**, 337-364 (2019).
2. Rodnina, M.V. The ribosome in action: tuning of translational efficiency and protein folding. *Protein Sci* **25**, 1390-406 (2016).
3. Waudby, C.A., Dobson, C.M. & Christodoulou, J. Nature and regulation of protein folding on the ribosome. *Trends Biochem Sci* (2019).
4. Nissen, P., Hansen, J., Ban, N., Moore, P.B. & Steitz, T.A. The structural basis of ribosome activity in peptide bond synthesis. *Science* **289**, 920-30 (2000).
5. Woolhead, C.A., McCormick, P.J. & Johnson, A.E. Nascent membrane and secretory proteins differ in FRET-detected folding far inside the ribosome and in their exposure to ribosomal proteins. *Cell* **116**, 725-736 (2004).
6. Holtkamp, W. et al. Cotranslational protein folding on the ribosome monitored in real time. *Science* **350**, 1104-1107 (2015).
7. Mercier, E. & Rodnina, M.V. Co-Translational Folding Trajectory of the HemK Helical Domain. *Biochemistry* **57**, 3460-3464 (2018).
8. Khushoo, A., Yang, Z., Johnson, A.E. & Skach, W.R. Ligand-driven vectorial folding of ribosome-bound human CFTR NBD1. *Mol Cell* **41**, 682-92 (2011).
9. Lu, J. & Deutsch, C. Folding zones inside the ribosomal exit tunnel. *Nat Struct Mol Biol* **12**, 1123-9 (2005).
10. Kosolapov, A. & Deutsch, C. Tertiary interactions within the ribosomal exit tunnel. *Nat Struct Mol Biol* **16**, 405-11 (2009).
11. Tu, L., Khanna, P. & Deutsch, C. Transmembrane segments form tertiary hairpins in the folding vestibule of the ribosome. *J Mol Biol* **426**, 185-98 (2014).
12. Bhushan, S. et al. alpha-Helical nascent polypeptide chains visualized within distinct regions of the ribosomal exit tunnel. *Nat Struct Mol Biol* **17**, 313-7 (2010).
13. Javed, A., Christodoulou, J., Cabrita, L.D. & Orlova, E.V. The ribosome and its role in protein folding: looking through a magnifying glass. *Acta Crystallogr D Struct Biol* **73**, 509-521 (2017).
14. Nilsson, O.B. et al. Cotranslational Protein Folding inside the Ribosome Exit Tunnel. *Cell Rep* **12**, 1533-40 (2015).
15. Su, T. et al. The force-sensing peptide VemP employs extreme compaction and secondary structure formation to induce ribosomal stalling. *Elife* **6**(2017).
16. Nilsson, O.B. et al. Cotranslational folding of spectrin domains via partially structured states. *Nat Struct Mol Biol* (2017).
17. Kaiser, C.M., Goldman, D.H., Chodera, J.D., Tinoco, I., Jr. & Bustamante, C. The ribosome modulates nascent protein folding. *Science* **334**, 1723-7 (2011).
18. Liu, K., Rehfus, J.E., Mattson, E. & Kaiser, C.M. The ribosome destabilizes native and non-native structures in a nascent multidomain protein. *Protein Sci* **26**, 1439-1451 (2017).
19. Alexander, L.M., Goldman, D.H., Wee, L.M. & Bustamante, C. Non-equilibrium dynamics of a nascent polypeptide during translation suppress its misfolding. *Nat Commun* **10**, 2709 (2019).

20. Waudby, C.A. et al. Systematic mapping of free energy landscapes of a growing filamin domain during biosynthesis. *Proc Natl Acad Sci U S A* **115**, 9744-9749 (2018).
21. Cabrita, L.D. et al. A structural ensemble of a ribosome-nascent chain complex during cotranslational protein folding. *Nat Struct Mol Biol* **23**, 278-285 (2016).
22. Kim, S.J. et al. Translational tuning optimizes nascent protein folding in cells. *Science* **348**, 444-448 (2015).
23. Samelson, A.J. et al. Kinetic and structural comparison of a protein's cotranslational folding and refolding pathways. *Sci Adv* **4**, eaas9098 (2018).
24. Farias-Rico, J.A., Ruud Selin, F., Myronidi, I., Fruhauf, M. & von Heijne, G. Effects of protein size, thermodynamic stability, and net charge on cotranslational folding on the ribosome. *Proc Natl Acad Sci U S A* **115**, E9280-E9287 (2018).
25. Samelson, A.J., Jensen, M.K., Soto, R.A., Cate, J.H. & Marqusee, S. Quantitative determination of ribosome nascent chain stability. *Proc Natl Acad Sci U S A* **113**, 13402-13407 (2016).
26. Ismail, N., Hedman, R., Schiller, N. & von Heijne, G. A biphasic pulling force acts on transmembrane helices during translocon-mediated membrane integration. *Nat Struct Mol Biol* **19**, 1018-22 (2012).
27. Fritch, B. et al. Origins of the Mechanochemical Coupling of Peptide Bond Formation to Protein Synthesis. *J Am Chem Soc* **140**, 5077-5087 (2018).
28. Ito, K. & Chiba, S. Arrest peptides: cis-acting modulators of translation. *Annu Rev Biochem* **82**, 171-202 (2013).
29. Goldman, D.H. et al. Mechanical force releases nascent chain-mediated ribosome arrest in vitro and in vivo. *Science* **348**, 457-460 (2015).
30. Tian, P. et al. Folding pathway of an Ig domain is conserved on and off the ribosome. *Proc Natl Acad Sci U S A* **115**, E11284-E11293 (2018).
31. Kemp, G., Kudva, R., de la Rosa, A. & von Heijne, G. Force-profile analysis of the cotranslational folding of HemK and filamin domains: Comparison of biochemical and biophysical folding assays. *J Mol Biol* **431**, 1308-1314 (2019).
32. Neuweiler, H., Schulz, A., Bohmer, M., Enderlein, J. & Sauer, M. Measurement of submicrosecond intramolecular contact formation in peptides at the single-molecule level. *J Am Chem Soc* **125**, 5324-30 (2003).
33. Neuweiler, H., Johnson, C.M. & Fersht, A.R. Direct observation of ultrafast folding and denatured state dynamics in single protein molecules. *Proc Natl Acad Sci U S A* **106**, 18569-74 (2009).
34. Neuweiler, H., Banachewicz, W. & Fersht, A.R. Kinetics of chain motions within a protein-folding intermediate. *Proc Natl Acad Sci U S A* **107**, 22106-10 (2010).
35. Schulze, A. et al. Cooperation of local motions in the Hsp90 molecular chaperone ATPase mechanism. *Nat Chem Biol* **12**, 628-35 (2016).
36. Yang, Z. et al. Structural characterization and comparative phylogenetic analysis of Escherichia coli HemK, a protein (N5)-glutamine methyltransferase. *J Mol Biol* **340**, 695-706 (2004).

37. Leininger, S.E., Trovato, F., Nissley, D.A. & O'Brien, E.P. Domain topology, stability, and translation speed determine mechanical force generation on the ribosome. *Proc Natl Acad Sci U S A* **116**, 5523-5532 (2019).
38. Doose, S., Neuweiler, H. & Sauer, M. Fluorescence quenching by photoinduced electron transfer: a reporter for conformational dynamics of macromolecules. *Chemphyschem* **10**, 1389-98 (2009).
39. Luitz, M.P. et al. Covalent dye attachment influences the dynamics and conformational properties of flexible peptides. *PLOS ONE* **12**, e0177139 (2017).
40. Lum, J.K., Neuweiler, H. & Fersht, A.R. Long-range modulation of chain motions within the intrinsically disordered transactivation domain of tumor suppressor p53. *J Am Chem Soc* **134**, 1617-22 (2012).
41. Dagan, S. et al. Stabilization of a protein conferred by an increase in folded state entropy. *Proc Natl Acad Sci U S A* **110**, 10628-33 (2013).
42. Nissley, D.A. & O'Brien, E.P. Structural Origins of FRET-Observed Nascent Chain Compaction on the Ribosome. *J Phys Chem B* **122**, 9927-9937 (2018).
43. Walters, B.T., Mayne, L., Hinshaw, J.R., Sosnick, T.R. & Englander, S.W. Folding of a large protein at high structural resolution. *Proc Natl Acad Sci U S A* **110**, 18898-903 (2013).
44. Hu, W. et al. Stepwise protein folding at near amino acid resolution by hydrogen exchange and mass spectrometry. *Proc Natl Acad Sci U S A* **110**, 7684-9 (2013).
45. Bai, Y., Sosnick, T.R., Mayne, L. & Englander, S.W. Protein folding intermediates: native-state hydrogen exchange. *Science* **269**, 192-7 (1995).
46. Englander, S.W. & Mayne, L. The nature of protein folding pathways. *Proc Natl Acad Sci U S A* **111**, 15873-80 (2014).
47. Stanley, N., Esteban-Martin, S. & De Fabritiis, G. Kinetic modulation of a disordered protein domain by phosphorylation. *Nat Commun* **5**, 5272 (2014).
48. Nettels, D., Gopich, I.V., Hoffmann, A. & Schuler, B. Ultrafast dynamics of protein collapse from single-molecule photon statistics. *Proc Natl Acad Sci U S A* **104**, 2655-60 (2007).
49. Waldauer, S.A., Bakajin, O. & Lapidus, L.J. Extremely slow intramolecular diffusion in unfolded protein L. *Proc Natl Acad Sci U S A* **107**, 13713-7 (2010).
50. Gruebele, M., Dave, K. & Sukenik, S. Globular Protein Folding In Vitro and In Vivo. *Annu Rev Biophys* **45**, 233-51 (2016).
51. Gibson, D.G. et al. Creation of a bacterial cell controlled by a chemically synthesized genome. *Science* **329**, 52-6 (2010).
52. Gibson, D.G. et al. Enzymatic assembly of DNA molecules up to several hundred kilobases. *Nat Methods* **6**, 343-5 (2009).
53. Nakatogawa, H. & Ito, K. The ribosomal exit tunnel functions as a discriminating gate. *Cell* **108**, 629-636 (2002).
54. Rodnina, M.V. & Wintermeyer, W. GTP consumption of elongation factor Tu during translation of heteropolymeric mRNAs. *Proc Natl Acad Sci U S A* **92**, 1945-9 (1995).
55. Mittelstaet, J., Konevega, A.L. & Rodnina, M.V. A kinetic safety gate controlling the delivery of unnatural amino acids to the ribosome. *J Am Chem Soc* **135**, 17031-8 (2013).

56. Doerfel, L.K. et al. EF-P is essential for rapid synthesis of proteins containing consecutive proline residues. *Science* **339**, 85-8 (2013).
57. Milon, P. et al. Transient kinetics, fluorescence, and FRET in studies of initiation of translation in bacteria. *Methods Enzymol* **430**, 1-30 (2007).
58. Schagger, H. Tricine-SDS-PAGE. *Nat Protoc* **1**, 16-22 (2006).
59. Krichevsky, O. & Bonnet, G. Fluorescence correlation spectroscopy: the technique and its applications. *Reports on Progress in Physics* **65**, 251-297 (2002).
60. Allen, N.W. & Thompson, N.L. Ligand binding by estrogen receptor beta attached to nanospheres measured by fluorescence correlation spectroscopy. *Cytometry A* **69**, 524-32 (2006).
61. Johnson, K.A., Simpson, Z.B. & Blom, T. Global kinetic explorer: a new computer program for dynamic simulation and fitting of kinetic data. *Anal Biochem* **387**, 20-9 (2009).
62. Johnson, K.A., Simpson, Z.B. & Blom, T. FitSpace explorer: an algorithm to evaluate multidimensional parameter space in fitting kinetic data. *Anal Biochem* **387**, 30-41 (2009).
63. Limpouchova, Z. & Prochazka, K. Theoretical principles of fluorescence spectroscopy. in *Fluorescence Studies of Polymer Containing Systems*, Vol. 16 91-149 (2016).
64. Sharma, A., Enderlein, J. & Kumbhakar, M. Photon Antibunching Reveals Static and Dynamic Quenching Interaction of Tryptophan with Atto-655. *J Phys Chem Lett* **8**, 5821-5826 (2017).
65. Fersht, A., Fersht, U.A., Freeman, W.H. & Company. *Structure and Mechanism in Protein Science: A Guide to Enzyme Catalysis and Protein Folding*, (W. H. Freeman, 1999).
66. Baryshnikova, E.N., Melnik, B.S., Finkelstein, A.V., Semisotnov, G.V. & Bychkova, V.E. Three-state protein folding: experimental determination of free-energy profile. *Protein Sci* **14**, 2658-67 (2005).

## **Acknowledgements**

We thank Wolfgang Wintermeyer for critical reading the manuscript; Anna Pfeifer, Olaf Geintzer, Sandra Kappler, Christina Kothe, Theresia Niese, Tanja Wiles, Franziska Hummel, Tessa Hübner, Vanessa Herold and Michael Zimmermann for expert technical assistance. Funding: The work was funded by the Max Planck Society and by the European Research Council (ERC) Advanced Investigator Grant RIBOFOLD (proposal number n° 787926).

## **Author contributions**

M.L. designed and performed the experiments, analyzed and interpreted data, and wrote the manuscript; M.M. performed the PET-FCS experiments, analyzed and interpreted data; E.S. designed the experiments and interpreted data; J.E. provided input into PET-FCS experiments; M.V.R. supervised the project, designed the experiments, and wrote the manuscript. All authors contributed to writing the manuscript.

## **Competing interests**

The authors declare no competing interests.

## METHODS

**HemK constructs for PET and FPA.** The HemK (methyl transferase HemK) coding sequence (ECBD\_2409, 834 p, 277aa) was derived from the pET-24a vector. For PET measurements, Trp at position 78 and – where indicated – Trp6 were mutated to Phe either in the wt or the 4xA HemK NTD sequence. The looped construct was generated using Gibson assembly reaction protocol<sup>51,52</sup> introducing five additional glycines in the loop between helix 3 and helix 4, before the wt Gly at position 43. Primers used to generate the glycine insert: forward 5'-CTCGCCTTTGGCGGCGGC and reverse 5'-GCGTTTCACCGCCGCGCC, primers used to linearize the vector: forward 5'-GGCGGCGGCGGCGGCGGTGAAACGCAGCT and reverse 5'-AAAGGCGAGGATAAAAGTACGCCCTTTGCC. mRNA transcription templates were generated for all lengths using universal commercially available T7 forward primer (Eurofins Genomics, Ebersberg) and three unique reverse primers for the required constructs: 70 (5'-ATGAGCAATGGGTTCCACCATCG), 102 (5'-TGCCTGCTCCACCAGACTCC), 112 (5'-ACGGCAAGGTTGTTTCAGGCA) (Eurofins Genomics, Ebersberg). All PET-FCS constructs are shown in Supplementary Table 10.

The FPA reporters contained a sequence of wt or 4xA HemK (aa 1-101) followed by the 17 aa SecM stalling peptide<sup>53</sup>, and a 20 aa sequence of cold shock protein A (CspA) (aa 1-20) (UniProt ID: P0A9X9), all truncations shown in Supplementary Table 11. The full-length plasmids were synthesized by Eurofins Genomics (Ebersberg, Germany) using a pEX-A128 vector carrying a kanamycin resistance cassette. C-terminal HemK truncations were performed via a cloning protocol that involved vector linearization during PCR (all primer sequences available upon request). All generated constructs were verified by Sanger sequencing (Microsynth AG, Göttingen, Germany). mRNA transcription templates were generated for all FPA constructs using universal T7 forward and CspA reverse primer (5'-AGGAGTGATGAAGCCGAAGCCT) (Eurofins Genomics, Ebersberg).

All mRNAs lacked a stop codon and were transcribed *in vitro* in buffer (40 mM Tris-HCl, pH 7.5, 15 mM MgCl<sub>2</sub>, 2 mM spermidine, 10 mM NaCl, 10 mM DTT, 5 mM GMP). The DNA template (10% (v/v)) was incubated with 3 mM each of GTP, ATP, CTP and UTP, pyrophosphatase (5 u/ml), RiboLock RNase inhibitor (1.5 % (v/v), Fermentas), and T7 RNA-polymerase (1.6 u/μL), for 4h at 37°C. The mRNA was purified by anion exchange chromatography on a HiTrap Q HP column (GE Healthcare) operated on Äkta FPLC system in buffer 30 mM Bis-Tris pH 6, 1 mM EDTA, 300 mM NaCl. mRNA was eluted using a linear gradient from 300 mM to 1.5 M NaCl over 20 column volumes. The mRNA-containing fractions were pooled, the mRNAs precipitated with ethanol and the mRNAs pelleted by centrifugation at 4000 g for 1h at 4°C. The mRNA pellets were resuspended in RNase- and DNase-free water

and the concentration was measured using Nanodrop 2000c (Thermo Scientific). 8 M urea 10% polyacrylamide gel electrophoresis was used for mRNA quality control.

***In vitro* translation.** Translation components, including 70S ribosomes, initiation factors, elongation factors (EF-G and EF-Tu) and total aminoacyl-tRNAs (aa-tRNAs) were prepared as described<sup>6,54-57</sup>. Initiation complexes were formed in buffer A (50 mM HEPES pH 7.5, 70 mM NH<sub>4</sub>Cl, 30 mM KCl, 7 mM MgCl<sub>2</sub>, with 2 mM DTT, and 2 mM GTP). Ribosomes (0.5 μM) were incubated with initiation factors (IF1, IF2, and IF3; 2.25 μM each), mRNA (1.5 μM), and ATTO655-[<sup>3</sup>H]Met-tRNA<sup>fMet</sup> (1 μM; for PET-FCS) or BodipyFL-[<sup>3</sup>H]Met-tRNA<sup>fMet</sup> (1 μM; for arrest peptide assay) for 45 min at 37°C. Fluorescence-labeled tRNAs were prepared as described<sup>55</sup>. EF-Tu-GTP was prepared in buffer A by incubating EF-Tu-GDP (120 μM) with phosphoenol pyruvate (3 mM) pyruvate kinase (0.05 mg/mL) for 15 min at 37°C. The ternary complex EF-Tu-GTP-aa-tRNA was formed by adding total aminoacyl-tRNA (200 μM) to EF-Tu-GTP followed by a 1 min incubation at 37°C.

All *in vitro* translation reactions were performed in buffer B (50 mM HEPES pH 7.5, 70 mM NH<sub>4</sub>Cl, 30 mM KCl, 3.5 mM MgCl<sub>2</sub>, 1 mM DTT, 0.5 mM spermidine and 8 mM putrescine). Initiation complexes (40 nM) were mixed with EF-Tu-GTP-aa-tRNA (50 μM) and EF-G (1 μM), and incubated for 5 min at 37°C. All mRNAs lacked the final stop codon and produced RNCs stalled with a peptidyl-tRNA in the P site. For PET-FCS, the RNCs were purified from translation factors and unbound fluorescence-labeled tRNA by sucrose cushion centrifugation using 2.2 M sucrose in buffer B. The ribosomes were pelleted using the TLA-100 rotor (Beckman Coulter) at 68,000 rpm for 40 min at 4°C. The pellet containing RNC was resuspended in buffer B, and the RNC concentration was determined by liquid-liquid radioactivity counting of <sup>3</sup>H-labeled Met. The complexes were flash frozen in liquid nitrogen and stored in -80°C until use. Translation efficiency was monitored on Tris-tricine SDS PAGE.

All translation samples were prepared for Tris-tricine SDS PAGE as follows. The nascent chains were released from the ribosome by adding 1.5 M hydroxylamine and incubating the samples for 1h at 37°C. The samples were then diluted with gel loading buffer (50 mM Tris-HCl pH 6.8, 4% w/v SDS, 2% v/v 2-mercaptoethanol and 12% w/v glycerol) and translation products were separated using Tris-Tricine SDS-PAGE<sup>58</sup>. A 16.5% separating gel (49.5% T, 6% C), 10% spacer gel and 4% stacking gel were used. The *in vitro* translation products were visualized by detecting the N-terminal dye using a Fujifilm FLA-9000 fluorescence scanner equipped with a laser of 488 nm wavelength to detect Bodipy FL, or the 680 nm laser to detect ATTO-655. The band intensities on the gel were quantified and analyzed using LI-COR Biosciences GmbH Image Studio version 5.2.5. In case of 4xA variant FPA construct 65 onwards, the FL and AR products run as double bands and were quantified as such. The

fraction of full-length product was calculated by dividing the full-length band intensity by the sum of the full-length and arrested band intensities (Supplementary Fig. 1e).

To produce free peptide, nascent chains were released from the ribosome with hydroxylamine. RNC was incubated with hydroxylamine (5% w/v; pH  $\leq$  8) for 1h at 37°C. This was followed by a sucrose cushion centrifugation as above. The supernatant containing the released nascent chains was collected for PET-FCS measurements.

**Fluorescence correlation spectroscopy.** Fluorescence correlation measurements were performed using the MicroTime 200 system (PicoQuant, Berlin, Germany), which is based on a modified Olympus IX 73 confocal microscope and equipped with a water objective lens with 60x magnification and 1.2 N.A. (Olympus UPlanSApo). For excitation, a collimated laser (LDH-D-C-640, PicoQuant GmbH) beam with 636.5 nm wavelength (operated in continuous wave mode) with large diameter was focused through the objective into the sample solution. The laser power was set to  $\sim$ 40  $\mu$ W to minimize Atto655 triplet state formation and to avoid photobleaching. Fluorescence signals were collected using the same objective (epifluorescence configuration) and separated from the excitation light by a dichroic mirror. After that, the collected fluorescence light was focused through a 50  $\mu$ m pinhole to eliminate fluorescence coming from axial positions away from the focal plane (confocal detection). A 50/50 beam splitter was used to split the fluorescence signal into two channels, where light was focused onto two single-photon avalanche photodiodes (SPAD) after passing through a band pass filter (690/70 nm). The signals of two SPADs were cross-correlated to eliminate SPAD after-pulsing effects.

Purified RNCs were measured at  $\sim$ 4 nM in buffer B, and sample concentration was adjusted in such a way as to yield an average of one molecule within the confocal detection volume for all measurements. For the Trp titrations, ACFs were recorded for purified RNCs of HemK 70 W6F and HemK 102 W6F at different concentrations of added Trp. A solution of 70 mM Trp was prepared in buffer B, and final free Trp concentrations ranged from 1.8 mM to 45 mM. The recorded ACFs were then fitted (Equation 1), and the parameters obtained were processed as described below. Measurements were performed at ambient temperature (22°C). For each RNC solution, single-photon fluorescence detection events were recorded for at least four consecutive time intervals of 10 min. The auto-correlation functions (ACF) were computed using the SymPhoTime 64 software (PicoQuant). After normalization, these ACFs were compared to confirm that the RNCs were stable throughout the duration of the measurement, and the technical replicates were averaged. The experiments were repeated a minimum of 2-3 times for the same class of RNCs from different preparations.

The microscope is set up with a detection volume where the longitudinal dimension is much larger than the transverse dimension. The variance in fit using a 3D versus 2D diffusion models



for the fast relaxation times was 2-9%, and 11% for  $\tau_D$ , therefore fitting of initial ACFs was carried out using a model for 2D single species diffusion<sup>59,60</sup> with two relaxation rate constants, a triplet rate constant, and a diffusion rate constant,

$$G(\tau) = (1 + c_1 e^{-k_1 \tau} + c_2 e^{-k_2 \tau}) \left( \frac{1-F+F e^{-k_f \tau}}{1-F} \right) \left( \frac{1}{N} \right) (1 + k_d \tau)^{-1} \text{ (Equation 1),}$$

where  $k_1$  and  $k_2$  are apparent relaxation rate constants with respective amplitudes  $c_1$  and  $c_2$ ,  $N$  is the average number of molecules in the confocal volume,  $F$  is the amplitude for the triplet component with rate constant  $k_f$ , and  $k_d$  is the inverse diffusion time.

**Kinetic modeling.** To fit the ACFs of the PET-FCS measurements in the commercial KinTek software, the diffusion and triplet state components were subtracted from each curve using the respective fitted parameters (Equation 1; Supplementary Table 2). The software KinTek Global Kinetic Explorer V 6.3 was used for kinetic modelling<sup>61,62</sup>. In all cases, the exponential decays of different PET quenching curves were simulated by the KinTek software as a sum of species C, D, R (or Rx), and W (or Wx) (see text) for a given HemK construct, multiplied by a species-specific amplitude coefficient. The amplitude coefficients were assumed to be identical for all simulated traces in a particular dataset. We determined the model that was sufficient to fit our data by testing a series of models with increasing complexity:

Model 2e is two-equilibria model (Supplementary Fig. 3a) that describes three nascent chain states: the nascent chain interactions with the ribosome (state D  $\leftrightarrow$  R), and the nascent chain interaction with Trp6 (state D  $\leftrightarrow$  W). This model could not fit the data in a satisfactory way as indicated by the poor quality of fit, reflected by a  $\chi^2/\text{DoF}$  value of 39 (Supplementary Fig. 3c).

Model 3e is three-equilibria model that introduces one additional reversible reaction to model 2e to describe conformational fluctuations between states (state D  $\leftrightarrow$  state C) (Supplementary Fig. 3b). This model was also insufficient to obtain a good quality fit, reflected by a  $\chi^2/\text{DoF}$  value of 46 (Supplementary Fig. 3d).

Model 5e-O - contains five equilibria: conformational fluctuations between different states of nascent chains (state C  $\leftrightarrow$  state D), in each of these states the nascent chain can be quenched by the ribosome surface (R) or by the in-chain Trp (W), meaning that there are two additional equilibria state C  $\leftrightarrow$  R and state C  $\leftrightarrow$  W. Here the quenched state R and state W connect the two states C and D and allow the conversion between nascent chain conformational states via one of the quenched states (Supplementary Fig. 4).

Model 5e-H – includes the same equilibria as model 5e-O, but separates the ribosome- and Trp-quenched states to Rc, Rd and Wc, Wd, respectively, and postulates that the conformational fluctuations can only occur directly between states (Fig 4.). Both 5e- models

were utilized to successfully fit the HemK RNC ACF data, reflected by a  $\chi^2/\text{DoF}$  value of 1.5 for model 5e-O, and 3.7 for model 5e-H (Fig. 4, Supplementary Fig. 4 and 6).

The dominant Trp quenching mechanism for ATTO655 is through static quenching due to stacking interactions in the fluorophore–quencher pair; the dissociation rate of the quenched complex is defined by the specific properties of these stacking interactions<sup>63,64</sup>. Therefore, the dissociation rate (dequenching) constant of the ATTO655–Trp complex is expected to be independent of the source of Trp or the structure of the RNC. To estimate the  $k_{\text{off}}$  for the ATTO655–Trp complex, we measured ACFs for HemK70 W6F and HemK102 W6F RNCs with increasing concentrations of free Trp in solution (Supplementary Fig. 5). Each RNC construct contained 7 ACFs for each tryptophan concentration of  $[\text{Trp}] = 0, 1.8, 4.5, 9, 18, 27, 45$  mM (dataset A), and each of these data curves contained the average of two independent replicates. The amplitudes of reactions in the ns and  $\mu\text{s}$  time domain increased with free Trp concentrations.

To determine the dequenching constant, we globally fit the titration dataset A to the kinetic models 5e-H and 5e-O (Supplementary Fig. 5) after introducing a term that is concentration-dependent (Trp binding to ATTO655), while all other rate constants remained concentration-independent and constant in all of these experiments. Global fitting of the data to model 5e-H yielded a  $2.2 \pm 0.2 \mu\text{s}^{-1}$  dequenching rate constant of the ATTO655–Trp pair (Supplementary Table 3), while model 5e-O yielded a  $2.0 \pm 0.1 \mu\text{s}^{-1}$  dequenching rate (Supplementary Table 4). Other rates were not sufficiently constrained by the Trp titration dataset, as evident from large standard errors (Supplementary Tables 3 and 4), and were not used in the following fitting.

In the second step, we locked the ATTO655–Trp dissociation rates at  $2 \mu\text{s}^{-1}$  and at  $2.2 \mu\text{s}^{-1}$  in their respective model 5e-O and 5e-H and globally fit the experimental dataset for different RNCs: 70, 102, 112 aa long HemK wt with Trp (W6) and without Trp (W6F), the 70 and 112 HemK 4xA W6 and W6F, HemK 102 loop W6F and HemK 112 loop W6F curves (dataset B) to the two 5e models. There were 16 unlinked independent rates. The W and Wx state dequenching  $k_{\text{off}}$  values were locked. The  $k_{\text{off}}$  rate from state R or Rx were coupled across all constructs, as this rate also depend on the properties of the dye-quenching pair, which should be uniform across the different complexes. In the case of HemK112 4xA, all rates were separated from other constructs except the  $k_{\text{off}}$  of R/Rx states. The rates of each step were linked between HemK70 wt and 4xA. The loop construct R/Rx state  $k_{\text{on}}$  rates were coupled to the corresponding wt construct R/Rx state  $k_{\text{on}}$  rates. For all constructs (except 112 4xA), state C to R/Rx and state C to W/Wx  $k_{\text{on}}$  were also linked, due to similarity. All reported  $\chi^2/\text{DoF}$  values and standard errors of mean in Supplementary Tables 3, 4, 5 and 6, were calculated using a covariance matrix derived using nonlinear regression algorithms.

Complete fitting results to model 5e-H are displayed in Fig. 4, Supplementary Fig. 5 and 6; Supplementary Tables 3, 5 and 8. Complete fitting results to model 5e-O are displayed in Supplementary Fig 4, 5 and 6, Supplementary Tables 4, 6 and 9. The confidence intervals for rate values obtained by the kinetic fits were calculated by the KinTek software using their in-built fitspace quality-of-fit assessment algorithm<sup>62</sup> that examines confidence contours at a constant  $\chi^2$  value of 0.833 for each rate parameter (Supplementary Table 7).

**Calculations of the transition state energy barrier.** Transition state theory was used to calculate the energy barrier between the conformational state ensembles of different HemK constructs. The  $k_{on}$  and rates of conformational fluctuations between states that were obtained from the kinetic modelling were used to solve for the transition state ( $\Delta G^\ddagger$ ) energy barrier between the states<sup>65,66</sup>

$$k_{on} = k_B \frac{T}{h} \kappa \cdot \exp\left(\frac{-\Delta G^\ddagger - D}{RT}\right) \quad (\text{Equation 2}),$$

where  $R$  is the gas constant  $8.3145 \text{ J mol}^{-1}$ ;  $T$  is temperature (295°K);  $\kappa$  is transmission coefficient (approximated to 1.0 in transition state theory)<sup>65</sup>;  $k_B$  is Boltzmann's constant  $1.38 \times 10^{-23} \text{ J K}^{-1}$ ; and  $h$  is Planck's constant  $6.6 \times 10^{-34} \text{ m}^2 \text{ kg s}^{-1}$ .
